# Supplementary material for: Clinical Assessment of Endothelial Function in Convalescent COVID-19 Patients Undergoing Multidisciplinary Pulmonary Rehabilitation
Source: MDPI journal article supplement (doi:10.3390/biomedicines9060614), 2021-05-28
Supplement: s1 [file s1]

## [Supplementary online material](#)

### **Clinical Assessment of Endothelial Function in Convalescent COVID-19 patients**

#### **Undergoing Multidisciplinary Pulmonary Rehabilitation.**

Pasquale Ambrosino, **MD PhD**<sup>1\*</sup> Antonio Molino, **MD**<sup>2\*</sup>

Ilenia Calcaterra, **MD**<sup>3</sup> Roberto Formisano, **MD**<sup>1</sup> Silvia Stufano, **PT**<sup>1</sup>

Giorgio Alfredo Spedicato, **PhD FCAS FSA CSPA CStat**<sup>4</sup> Andrea Motta, **PhD**<sup>5</sup>

Antimo Papa, **MD**<sup>1</sup> Matteo Nicola Dario Di Minno, **MD PhD**<sup>6\*\*</sup> Mauro Manisclaco, **MD PhD**<sup>1\*\*</sup>

\*The two Authors equally contributed to the manuscript.

\*\*The two Authors share co-seniorship.

#### **Table of contents**

|                               |                                                                                                                                                                                                      |
|-------------------------------|------------------------------------------------------------------------------------------------------------------------------------------------------------------------------------------------------|
| <b>Supplemental Figure S1</b> | <b>Flow chart of study participants.</b>                                                                                                                                                             |
| <b>Supplemental Table S1</b>  | <b>Pharmacological therapies and oxygen supplementation in convalescent COVID-19 patients undergoing pulmonary rehabilitation.</b>                                                                   |
| <b>Supplemental Table S2</b>  | <b>Impact of major clinical and demographic characteristics on changes in flow-mediated dilation (<math>\Delta</math>FMD) in convalescent COVID-19 patients undergoing pulmonary rehabilitation.</b> |

**Supplementary Figure S1. Flow chart of study participants.**

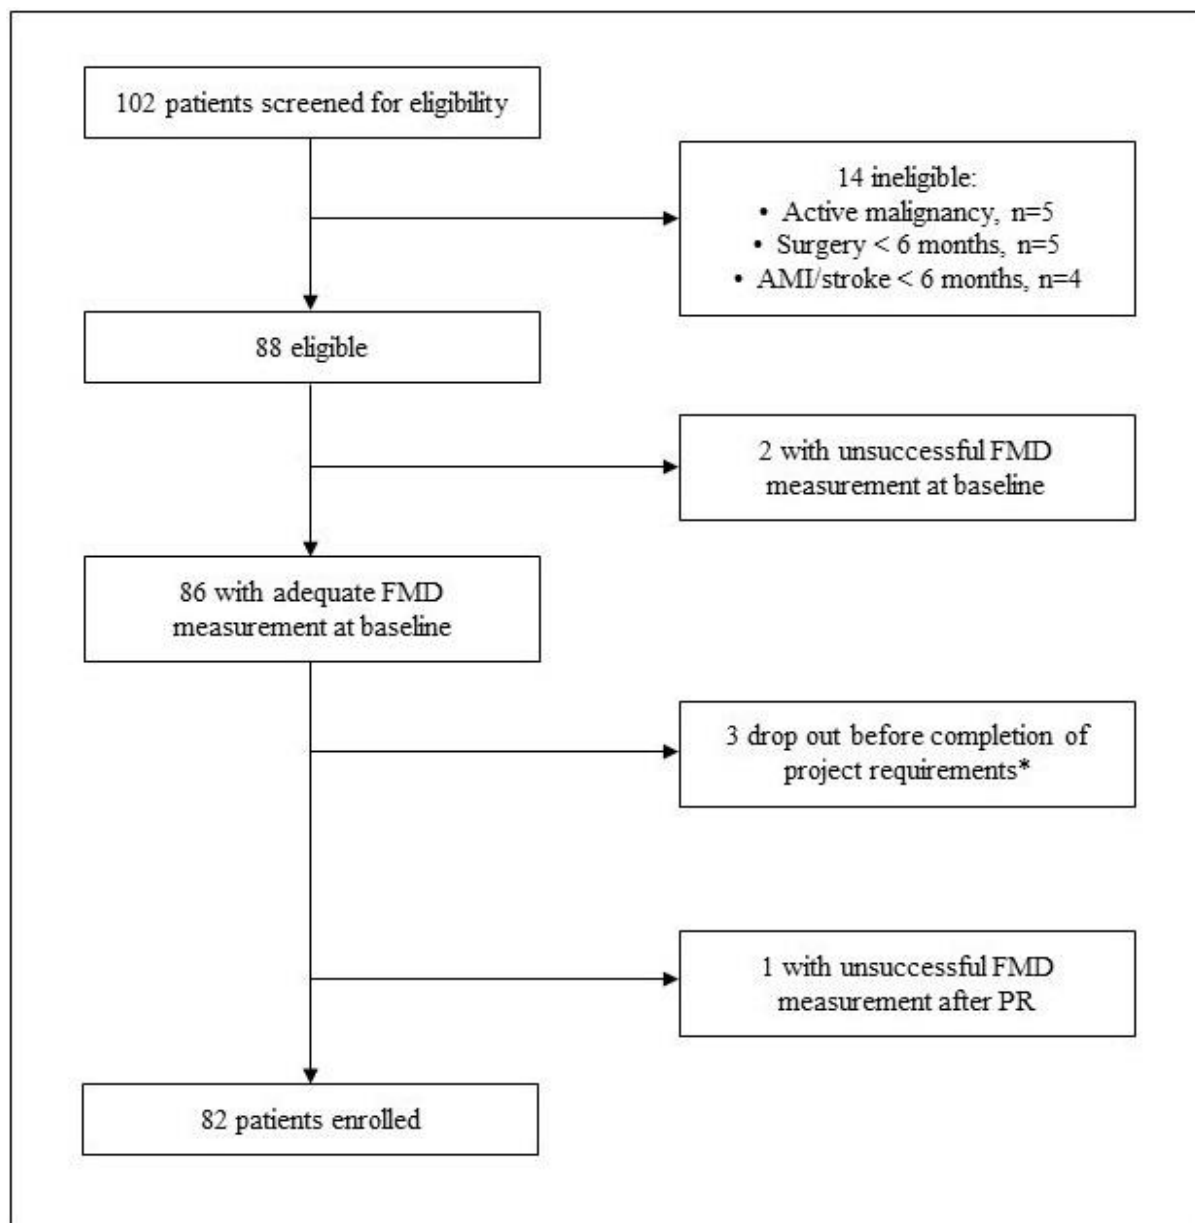

**AMI: acute myocardial infarction; FMD: flow-mediated dilation; PR; pulmonary rehabilitation.**

\*2 patients withdrawn informed consent for personal reasons, 1 patient transferred for clinical reasons.

**Supplemental Table S1. Pharmacological therapies and oxygen supplementation in convalescent COVID-19 patients undergoing pulmonary rehabilitation.**

|                                    | Baseline<br>N=82 | After PR<br>N=82 | P values         |
|------------------------------------|------------------|------------------|------------------|
| Statins (%)                        | 29.3             | -                | -                |
| Oral Antidiabetics (%)             | 15.8             | -                | -                |
| Insulin (%)                        | 12.2             | -                | -                |
| Allopurinol (%)                    | 4.9              | -                | -                |
| β-blockers (%)                     | 23.2             | -                | -                |
| ACE-I (%)                          | 25.6             | -                | -                |
| CCB (%)                            | 8.5              | -                | -                |
| ARB (%)                            | 8.5              | -                | -                |
| Diuretics (%)                      | 15.8             | -                | -                |
| Antiplatelet Drugs (%)             | 22.0             | -                | -                |
| Oral Anticoagulants (%)            | 17.1             | -                | -                |
| NSAIDs (%)                         | 23.2             | -                | -                |
| Corticosteroids (%)                | 62.2             | 56.1             | 0.525            |
| Antibiotics (%)                    | 22.0             | 3.7              | <b>0.001</b>     |
| LMWH (%)                           | 54.9             | 23.2             | <b>&lt;0.001</b> |
| O <sub>2</sub> at Rest (%)         | 31.7             | 12.2             | <b>0.004</b>     |
| O <sub>2</sub> Overnight (%)       | 26.8             | 12.2             | <b>0.029</b>     |
| O <sub>2</sub> During Exercise (%) | 30.5             | 12.2             | <b>0.007</b>     |

**N:** number; **PR:** pulmonary rehabilitation; **ACE-I:** angiotensin-converting enzyme inhibitors; **CCB:** calcium channel blockers; **ARB:** angiotensin II receptor blockers; **NSAIDs:** non-steroidal anti-inflammatory drugs; **LMWH:** low molecular weight heparin; **O<sub>2</sub>:** oxygen.

**Supplemental Table S2. Impact of major clinical and demographic characteristics on changes in flow-mediated dilation ( $\Delta$ FMD) in convalescent COVID-19 patients undergoing pulmonary rehabilitation.**

| Independent variable       | $\Delta$ FMD (presence vs. absence)     | P value |
|----------------------------|-----------------------------------------|---------|
| Elderly ( $\geq 65$ years) | +2.20% $\pm$ 2.76 vs. +1.49% $\pm$ 1.91 | 0.174   |
| Female gender              | +1.84% $\pm$ 3.63 vs. +1.74% $\pm$ 1.99 | 0.899   |
| Mechanical ventilation     | +1.89% $\pm$ 1.57 vs. +1.72% $\pm$ 2.46 | 0.779   |
| High-flow O <sub>2</sub>   | +1.46% $\pm$ 1.80 vs. +1.87% $\pm$ 2.43 | 0.475   |
| WHO class IV               | +1.91% $\pm$ 2.51 vs. +1.49% $\pm$ 1.78 | 0.428   |
| Hypertension               | +1.65% $\pm$ 2.68 vs. +1.86% $\pm$ 1.89 | 0.682   |
| Hypercholesterolemia       | +2.54% $\pm$ 2.19 vs. +1.71% $\pm$ 2.29 | 0.434   |
| Hypertriglyceridemia       | +2.89% $\pm$ 2.85 vs. +1.71% $\pm$ 2.25 | 0.383   |
| Diabetes mellitus          | +2.29% $\pm$ 2.44 vs. +1.65% $\pm$ 2.25 | 0.335   |
| Smoking                    | +1.47% $\pm$ 2.11 vs. +1.79% $\pm$ 2.31 | 0.710   |
| Obesity                    | +1.24% $\pm$ 1.66 vs. +1.99% $\pm$ 2.48 | 0.171   |
| Heart failure              | +2.23% $\pm$ 3.21 vs. +1.73% $\pm$ 2.23 | 0.637   |
| COPD                       | +1.33% $\pm$ 2.51 vs. +1.79% $\pm$ 2.27 | 0.634   |
| History of malignancy      | +0.77% $\pm$ 1.77 vs. +1.82% $\pm$ 2.30 | 0.321   |

**WHO: world health organization; O<sub>2</sub>: oxygen; COPD: chronic obstructive pulmonary disease.**
